# Supplementary material
Source: HighWire-hosted journal article supplement (https://bmjopen.bmj.com/content/10/6/e032412)
Supplement: inline-supplementary-material-1 [file inline-supplementary-material-1.pdf]

## 1062.00 - Family and General Practitioners

Physicians who diagnose, treat, and help prevent diseases and injuries that commonly occur in the general population. May refer patients to medical specialists when needed for further diagnosis or treatment.

**Sample of reported job titles:** Board Certified Family Physician, Family Medicine Physician, Family Physician, Family Practice Medical Doctor (FP MD), Family Practice Physician, Family Practitioner, Medical Doctor (MD), Medical Staff Physician, Physician, Primary Care Physician

View report:

[Summary](#)

[Details](#)

[Custom](#)

[Tasks](#) | [Knowledge](#) | [Skills](#) | [Abilities](#) | [Detailed Work Activities](#)

**Tasks** [Save Table \(XLS/CSV\)](#)

All 10 displayed

| Importance                                                                             | Category | Task                                                                                                                                                       |
|----------------------------------------------------------------------------------------|----------|------------------------------------------------------------------------------------------------------------------------------------------------------------|
| 95    | Core     | ⊕ Prescribe or administer treatment, therapy, medication, vaccination, and other specialized medical care to treat or prevent illness, disease, or injury. |
| 93    | Core     | ⊕ Order, perform, and interpret tests and analyze records, reports, and examination information to diagnose patients' condition.                           |
| 93  | Core     | ⊕ Collect, record, and maintain patient information, such as medical history, reports, or examination results.                                             |
| 92  | Core     | ⊕ Monitor patients' conditions and progress and reevaluate treatments as necessary.                                                                        |
| 91  | Core     | ⊕ Explain procedures and discuss test results or prescribed treatments with patients.                                                                      |
| 88  | Core     | ⊕ Advise patients and community members concerning diet, activity, hygiene, and disease prevention.                                                        |
| 85  | Core     | ⊕ Refer patients to medical specialists or other practitioners when necessary.                                                                             |
| 77  | Core     | ⊕ Coordinate work with nurses, social workers, rehabilitation therapists, pharmacists, psychologists, and other health care providers.                     |
| 75  | Core     | ⊕ Direct and coordinate activities of nurses, students, assistants, specialists, therapists, and other medical staff.                                      |
