# Supplementary material
Source: HighWire-hosted journal article supplement (https://bmjopen.bmj.com/content/10/6/e032412)
Supplement: inline-supplementary-material-2 [file inline-supplementary-material-2.pdf]

| Importance                                                                            | Knowledge                                                                                                                                                                                                                                                                           |
|---------------------------------------------------------------------------------------|-------------------------------------------------------------------------------------------------------------------------------------------------------------------------------------------------------------------------------------------------------------------------------------|
| 100  | <p>⊕ <b>Medicine and Dentistry</b> — Knowledge of the information and techniques needed to diagnose and treat human injuries, diseases, and deformities. This includes symptoms, treatment alternatives, drug properties and interactions, and preventive health-care measures.</p> |
| 91   | <p>⊕ <b>Psychology</b> — Knowledge of human behavior and performance; individual differences in ability, personality, and interests; learning and motivation; psychological research methods; and the assessment and treatment of behavioral and affective disorders.</p>           |
| 86   | <p>⊕ <b>Customer and Personal Service</b> — Knowledge of principles and processes for providing customer and personal services. This includes customer needs assessment, meeting quality standards for services, and evaluation of customer satisfaction.</p>                       |
| 85   | <p>⊕ <b>Biology</b> — Knowledge of plant and animal organisms, their tissues, cells, functions, interdependencies, and interactions with each other and the environment.</p>                                                                                                        |
| 83   | <p>⊕ <b>Therapy and Counseling</b> — Knowledge of principles, methods, and procedures for diagnosis, treatment, and rehabilitation of physical and mental dysfunctions, and for career counseling and guidance.</p>                                                                 |

[back to top](#)

## Skills [Save Table \(XLS/CSV\)](#)

 10 of 11 displayed

| Importance                                                                             | Skill                                                                                                                                                                                                                    |
|----------------------------------------------------------------------------------------|--------------------------------------------------------------------------------------------------------------------------------------------------------------------------------------------------------------------------|
| 85  | <p>⊕ <b>Critical Thinking</b> — Using logic and reasoning to identify the strengths and weaknesses of alternative solutions, conclusions or approaches to problems.</p>                                                  |
| 81  | <p>⊕ <b>Active Listening</b> — Giving full attention to what other people are saying, taking time to understand the points being made, asking questions as appropriate, and not interrupting at inappropriate times.</p> |
| 81  | <p>⊕ <b>Judgment and Decision Making</b> — Considering the relative costs and benefits of potential actions to choose the most appropriate one.</p>                                                                      |
| 78  | <p>⊕ <b>Reading Comprehension</b> — Understanding written sentences and paragraphs in work related documents.</p>                                                                                                        |
| 78  | <p>⊕ <b>Writing</b> — Communicating effectively in writing as appropriate for the needs of the audience.</p>                                                                                                             |
| 75  | <p>⊕ <b>Complex Problem Solving</b> — Identifying complex problems and reviewing related information to develop and evaluate options and implement solutions.</p>                                                        |
